# Supplementary material for: Soft Liquid Metal-Based Conducting Composite with Robust Electrical Durability for a Wearable Electrocardiogram Sensor
Source: MDPI journal article supplement (doi:10.3390/polym14163409), 2022-08-20
Supplement: s1 [file s1]

## **Supplementary Information**

### **Soft liquid metal-based conducting composite**

#### **with robust electrical durability for a wearable Electrocardiogram sensor**

**Yewon Kim<sup>†</sup>, Jihyang Song<sup>†</sup>, Soojung An, Mikyung Shin<sup>\*</sup>, Donghee Son<sup>\*</sup>**

<sup>†</sup>These authors contributed equally to this work

<sup>\*</sup>Correspondence to be addressed to: *daniel3600@g.skku.edu* and *mikyungshin@g.skku.edu*

**This PDF file includes:**

Supplementary Figures. S1–S3

## Supplementary Figures

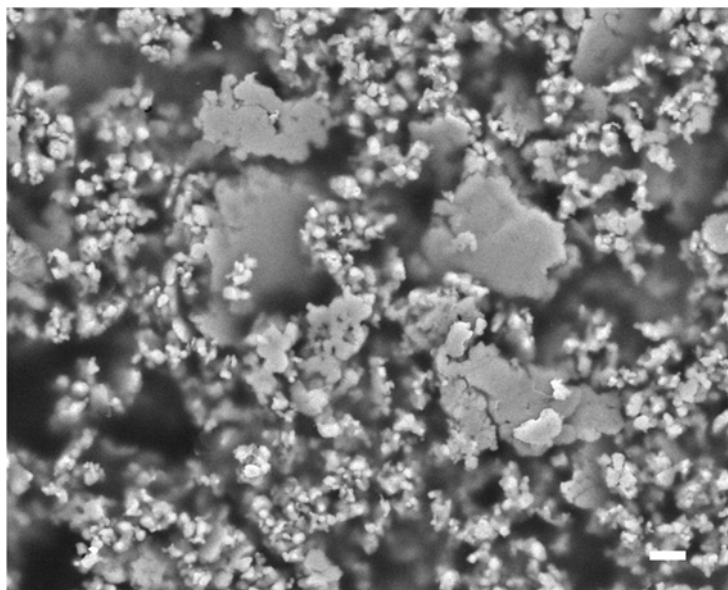

**Figure S1.** SEM image of AgF-SEBS composite (scale bar : 1  $\mu\text{m}$ ).

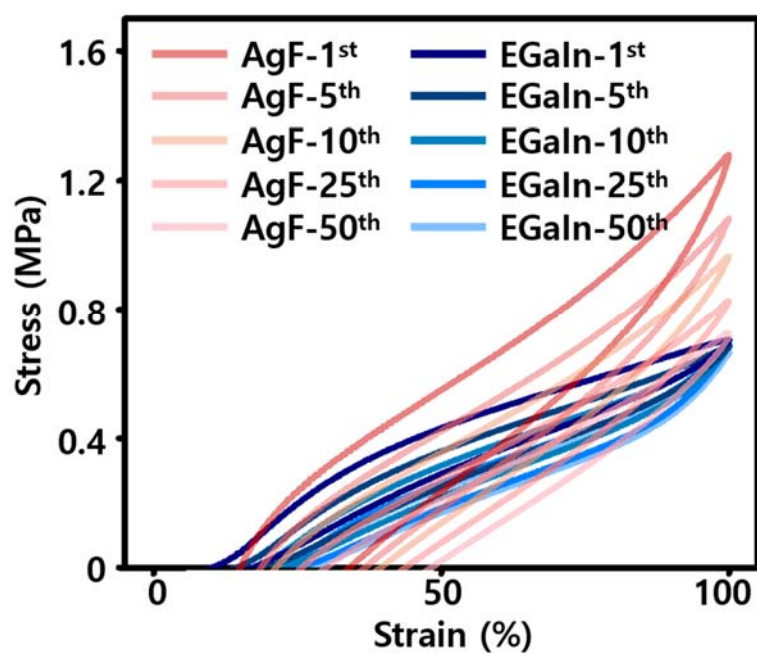

**Figure S2.** Stress-Strain cyclic test of EGaIn-SEBS composite and AgF-SEBS composite.

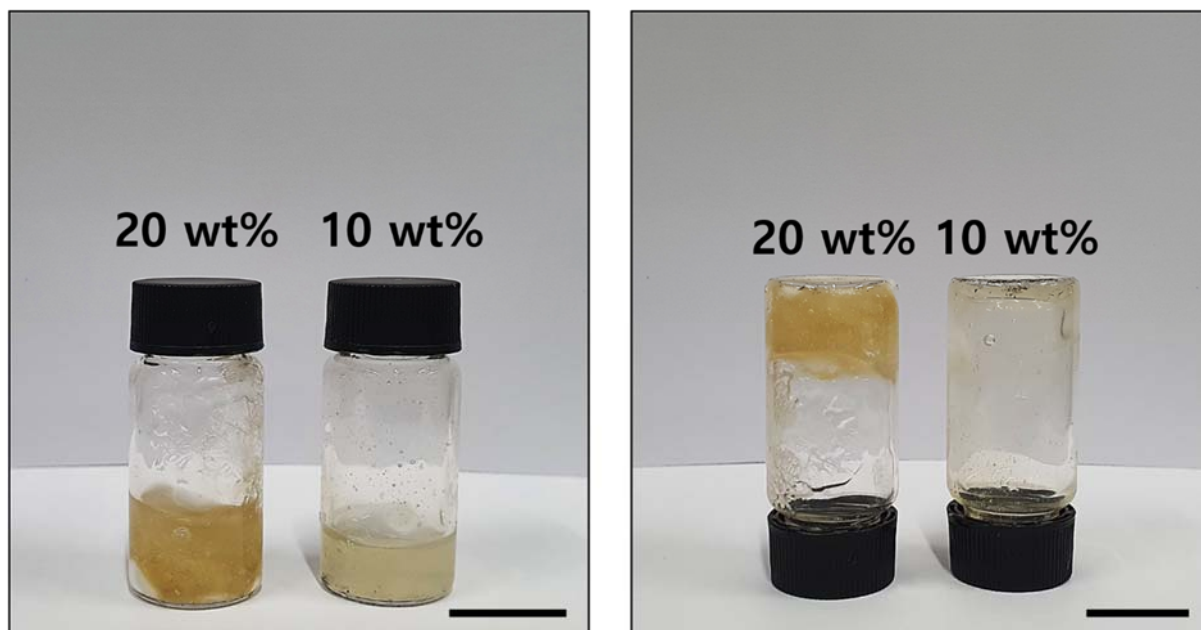

**Figure S3.** Photographs of 20 wt% and 10 wt% of alginate solution (left) and right after turning over the vials (right) (scale bar : 1 cm).
